# Supplementary material
Source: PubMed Central journal article supplement (PMC9904112)

**Conventions:**

- GenCore Laboratory
- CoVIDA drive/walk thru testing point

**Health Care Testing Centers**

- Public
- Private

**Health care network**

- North
- East-central
- South-west
- South

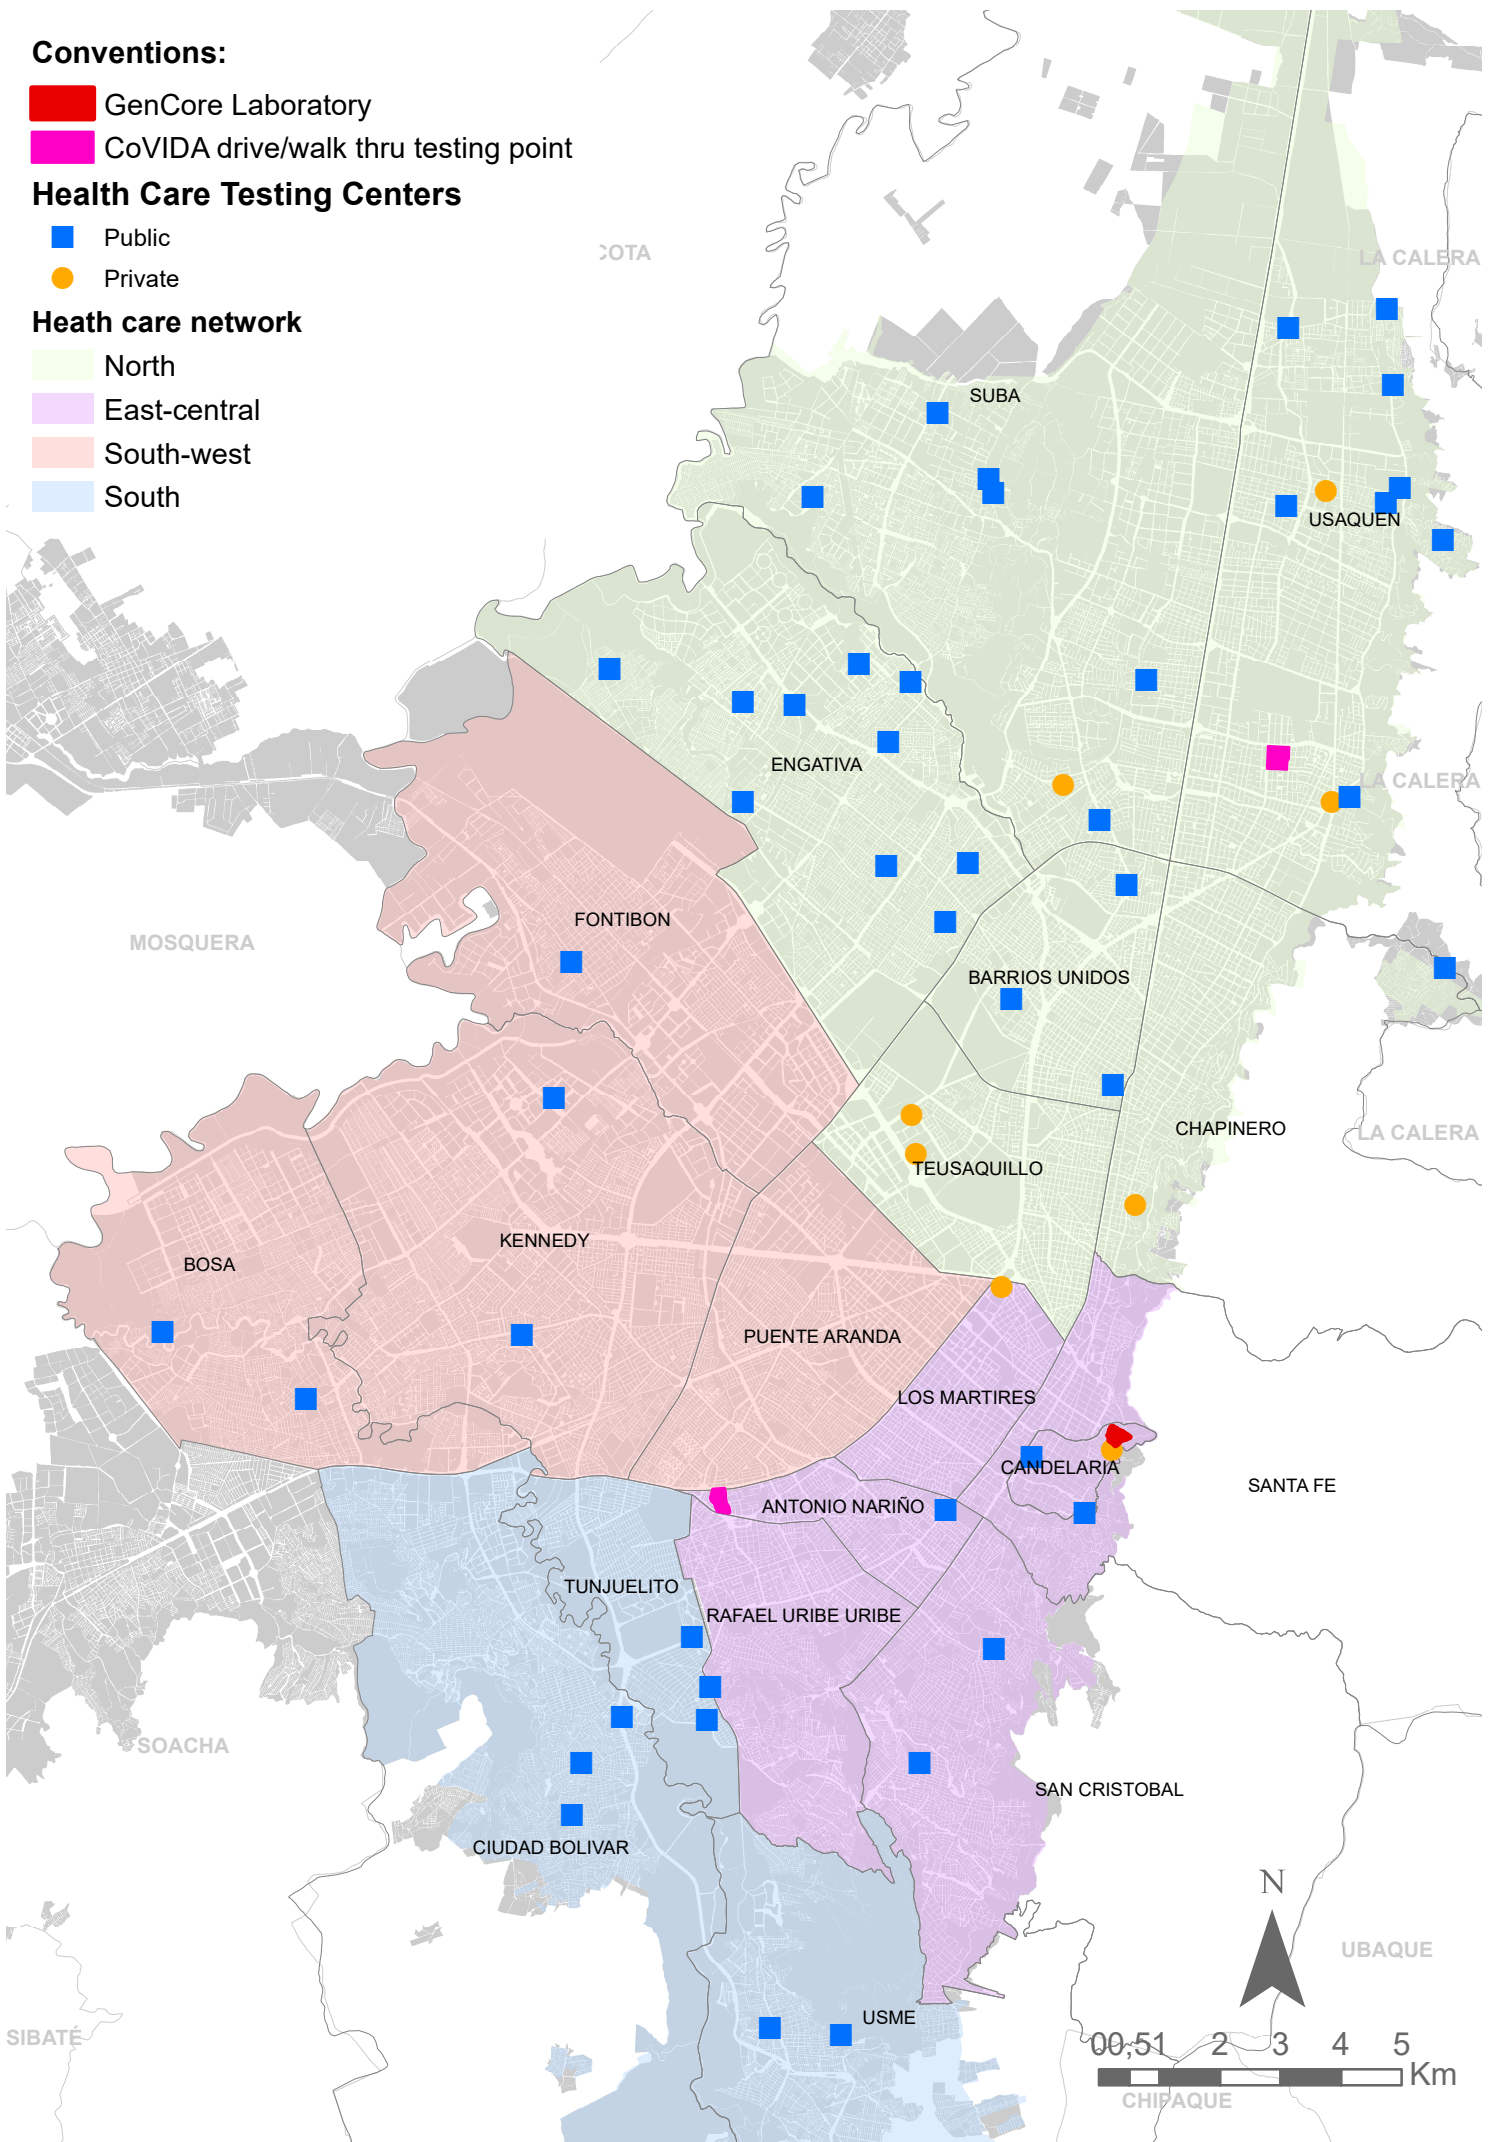

Supplement: mmc2.pdf [file mmc2.pdf]
